# Obesity in Diabetic Patients Undergoing Coronary Artery Bypass Graft Surgery Is Associated with Increased Postoperative Morbidity

Wei Pan, M.D.,\* Katja Hindler, M.D.,† Vei-Vei Lee, M.S.,‡ William K. Vaughn, Ph.D.,§ Charles D. Collard, M.D.¶

**Background:** Despite the fact that obesity is a known risk factor for cardiovascular disease, many studies have failed to demonstrate that obesity is independently associated with an increased risk of cardiovascular morbidity and mortality in nondiabetic patients undergoing coronary artery bypass graft surgery. The authors investigated the influence of obesity on adverse postoperative outcomes in diabetic and nondiabetic patients after primary coronary artery bypass surgery.

**Methods:** A retrospective cohort study of patients undergoing primary coronary artery bypass surgery (n = 9,862) between January 1995 and December 2004 at the Texas Heart Institute was performed. Diabetic (n = 3,374) and nondiabetic patients (n = 6,488) were classified into five groups, according to their body mass index: normal weight (n = 2,148), overweight (n = 4,257), mild obesity (n = 2,298), moderate obesity (n = 785), or morbid obesity (n = 338). Multivariate, stepwise logistic regression was performed controlling for patient demographics, medical history, and preoperative medications to determine whether obesity was independently associated with an increased risk of adverse postoperative outcomes.

**Results:** Obesity in nondiabetic patients was not independently associated with an increased risk of adverse postoperative outcomes. In contrast, obesity in diabetic patients was independently associated with a significantly increased risk of postoperative respiratory failure (odds ratio [OR], 2.26; 95% confidence interval [CI], 1.41–3.61; *P* < 0.001), ventricular tachycardia (OR, 2.27; 95% CI, 1.18–4.35; *P* < 0.02), atrial fibrillation (OR, 1.56; 95% CI, 1.03–2.38; *P* < 0.04), atrial flutter (OR, 2.38; 95% CI, 1.29–4.40; *P* < 0.01), renal insufficiency (OR, 1.66; 95% CI, 1.10–3.41; *P* < 0.03), and leg wound infection (OR, 5.34; 95% CI, 2.27–12.54; *P* < 0.001). Obesity in diabetic patients was not independently associated with an increased risk of mortality, stroke, myocardial infarction, sepsis, or sternal wound infection.

**Conclusion:** Obesity in diabetic patients is an independent predictor of worsened postoperative outcomes after primary coronary artery bypass graft surgery.

OBESITY and diabetes are key features of the metabolic syndrome, a cluster of metabolic abnormalities that includes hypertension and dyslipidemia.<sup>1</sup> Patients with metabolic syndrome are at greater risk of development of atherosclerotic cardiovascular events compared with nondiabetic, obese patients.<sup>2</sup> Although the underlying mechanisms have yet to be fully elucidated, increasing evidence suggests that the combination of obesity and diabetes is associated with increased systemic inflammation, endothelial dysfunction, and thrombogenicity, which may consequently promote accelerated atherosclerosis of the microvasculature and macrovasculature.<sup>3–6</sup> Obesity is also associated with increased proinflammatory cytokine levels, including tumor necrosis factor  $\alpha$ , interleukin 6, and C-reactive protein, all of which are also mediators of insulin resistance.<sup>4–8</sup> Insulin resistance in turn promotes the activation of multiple proinflammatory cellular transcription factors (e.g., nuclear factor  $\kappa$ B, activated protein 1), which act to maintain the inflammatory state.<sup>9</sup> Insulin resistance also results in decreased lipid metabolism (e.g., decreased apolipoprotein biosynthesis, increased low-density lipoprotein concentrations), further increasing the risk of atherosclerosis and endothelial dysfunction.<sup>10,11</sup>

Multiple clinical studies have investigated whether obesity is an independent predictor of postoperative cardiovascular morbidity and mortality after coronary artery bypass graft (CABG) surgery (table 1). However, despite being a well-known risk factor for cardiac disease, many clinical studies have failed to demonstrate that obesity is independently associated with an increased risk of in-hospital mortality and adverse postoperative outcomes, including death, myocardial infarction (MI), stroke, and renal failure.<sup>12–31</sup> The single most consistent finding among these studies to date is that obesity may independently predict an increased risk of postoperative wound infection.<sup>12–17,20–24</sup> Nonetheless, several studies have suggested that obesity may be an independent predictor of postoperative death and atrial arrhythmias.<sup>12,13,15,32–36</sup>

In contrast to nondiabetic obese patients, obese patients with diabetes may be at greater risk for systemic proinflammatory and thrombotic states and are thus more likely to have worsened postoperative outcomes after CABG surgery. Therefore, the aim of the current study was to investigate whether obesity is an independent predictor of increased postoperative morbidity and

This article is accompanied by an Editorial View. Please see: Neligan PJ, Fleisher LA: Obesity and diabetes: Evidence of increased perioperative risk? ANESTHESIOLOGY 2006; 104:398–400.

\* Assistant Professor of Anesthesiology, Baylor College of Medicine, Houston, Texas. † Clinical Research Fellow, Division of Cardiovascular Anesthesiology, ‡ Staff Statistician, § Vice President, Division of Biostatistics and Epidemiology, Texas Heart<sup>®</sup> Institute, St. Luke's Episcopal Hospital. ¶ Associate Professor of Anesthesiology, Baylor College of Medicine, Houston, Texas.

Received from the Division of Cardiovascular Anesthesiology, Texas Heart<sup>®</sup> Institute, St. Luke's Episcopal Hospital, Houston, Texas. Submitted for publication August 18, 2005. Accepted for publication November 17, 2005. Support was provided solely from institutional and/or departmental sources.

Address correspondence to Dr. Pan: Division of Cardiovascular Anesthesiology, The Texas Heart Institute at St. Luke's Episcopal Hospital, Baylor College of Medicine, 6720 Bertner Avenue, Houston, Texas 77030. wpan@heart.thi.tmc.edu. Individual article reprints may be purchased through the Journal Web site, www.anesthesiology.org.

**Table 1. Summary of Clinical Trials Previously Investigating Whether Obesity Is an Independent Risk Factor for Postoperative Morbidity and Mortality after CABG Surgery**

| Study (n = 25)                                   | Patients, n | Death | MI | AAs | Stroke | RF | RI | Bleeding  | SWI |
|--------------------------------------------------|-------------|-------|----|-----|--------|----|----|-----------|-----|
| Shuhaiber <i>et al.</i> <sup>32</sup> (1987)     | 170         | Y     |    |     |        |    |    |           | Y   |
| Edwards <i>et al.</i> <sup>33</sup> (1998)       | 344,913     | Y     |    |     |        |    |    |           |     |
| Hollenbeak <i>et al.</i> <sup>34</sup> (2000)    | 160         | Y     |    |     |        |    |    |           |     |
| Weiss <i>et al.</i> <sup>35</sup> (2000)         | 466         |       |    |     |        | Y  |    |           |     |
| Prahabkar <i>et al.</i> <sup>36</sup> (2002)     | 559,004     | Y     |    |     |        |    |    |           |     |
| Prasad <i>et al.</i> <sup>12</sup> (1991)        | 250         | N     | Y  | Y   |        |    |    |           | Y   |
| Moulton <i>et al.</i> <sup>13</sup> (1996)       | 2,299       | N     | N  | Y   | N      |    | N  | N         | Y   |
| Noyez <i>et al.</i> <sup>14</sup> (2000)         | 3,815       | N     |    |     |        |    |    |           | Y   |
| Gardlund <i>et al.</i> <sup>15</sup> (2001)      | 126         |       |    | Y   |        |    |    |           |     |
| Ridderstolpe <i>et al.</i> <sup>16</sup> (2001)  | 3,008       |       |    |     |        |    |    |           | Y   |
| Kuduvalli <i>et al.</i> <sup>21</sup> (2002)     | 4,713       | N     | N  | Y   | N      |    | N  |           | Y   |
| Schwann <i>et al.</i> <sup>17</sup> (2001)       | 3,560       | N     | N  | N   | N      |    | N  | N         | Y   |
| Clough <i>et al.</i> <sup>18</sup> (2002)        | 27,239      | N     |    |     |        |    |    |           |     |
| Gurm <i>et al.</i> <sup>19</sup> (2002)          | 1,526       | N     |    |     |        |    |    |           |     |
| Olsen <i>et al.</i> <sup>20</sup> (2002)         | 1,980       |       |    |     |        |    |    |           | Y   |
| Potapov <i>et al.</i> <sup>22</sup> (2002)       | 22,666      | N     | N  | N   | N      |    | N  | N         | Y   |
| Russo and Spelman <sup>23</sup> (2002)           | 3,000       |       |    |     |        |    |    |           | Y   |
| Lindhout <i>et al.</i> <sup>24</sup> (2004)      | 1,130       | N     | N  | N   | N      |    | N  | N         | Y   |
| Christiakakis <i>et al.</i> <sup>25</sup> (1995) | 7,025       | N     | N  | N   | N      | N  | N  | N         | N   |
| Brandt <i>et al.</i> <sup>26</sup> (2001)        | 500         | N     | N  | N   | N      | N  | N  | N         | N   |
| Reeves <i>et al.</i> <sup>27</sup> (2002)        | 4,372       | N     | N  | N   | N      | N  | N  | N         | N   |
| Rockx <i>et al.</i> <sup>28</sup> (2004)         | 1,310       | N     | N  | N   | N      | N  | N  | N         | N   |
| Jin <i>et al.</i> <sup>29</sup> (2005)           | 16,218      | N     |    |     |        |    |    |           |     |
| Birkmeyer <i>et al.</i> <sup>30</sup> (1998)     | 11,101      | N     | N  | N   | N      | N  | N  | Y (lower) | Y   |
| Kim <i>et al.</i> <sup>31</sup> (2003)           | 6,728       | N     | N  | N   | N      | N  | N  | Y (lower) | Y   |

AA = atrial arrhythmia; CABG = coronary artery bypass graft; MI = myocardial infarction; RF = renal failure; RI = respiratory insufficiency; SWI = sternal wound infection.

mortality in diabetic and nondiabetic patients undergoing primary CABG surgery.

## Materials and Methods

### Study Design

This retrospective cohort study was performed on all patients undergoing primary CABG surgery with cardiopulmonary bypass at the Texas Heart Institute, St. Luke's Episcopal Hospital, Houston, Texas, between January 1995 and December 2004 (n = 9,862), after obtaining approval of the institutional review board. Obesity was assessed using body mass index (BMI), calculated as weight (kg)/height squared (m<sup>2</sup>).<sup>37</sup> Diabetic (n = 3,374) and nondiabetic patients (n = 6,488) were classified into one of five groups at the time of surgery using the World Health Organization definition for obesity (table 2): normal weight (BMI 20.0–24.9 kg/m<sup>2</sup>; n = 2,184), overweight (BMI 25.0–29.9 kg/m<sup>2</sup>; n = 4,257), mild obesity (BMI 30.0–34.9 kg/m<sup>2</sup>; n = 2,298), moderate obesity (BMI

35.0–39.9 kg/m<sup>2</sup>; n = 785), or morbid obesity (BMI ≥ 40.0 kg/m<sup>2</sup>; n = 338).<sup>38</sup> Patients were classified as being diabetic based on their admission diagnosis or if they were receiving preoperative insulin or oral hypoglycemic agents at the time of admission. Patients undergoing emergent surgery or concomitant valve or other cardiac surgery (e.g., atrial septum defect repair, ventricular aneurysm resection) and patients who were underweight (BMI < 20.0 kg/m<sup>2</sup>) were excluded from the study.

### Data Collection

Patient demographics, preoperative and intraoperative risk factors, and the incidence of adverse postoperative outcomes were obtained from the Texas Heart Institute cardiac surgical database.<sup>39</sup> Measured adverse postoperative outcomes included 30-day all-cause mortality, MI, cardiac arrhythmias, respiratory failure, stroke, renal dysfunction, infection, and need for mediastinal reexploration. A diagnosis of MI was made if there were new Q waves (Minnesota code 1-1-1 to 1-2-7), new per-

**Table 2. Number of Diabetic and Nondiabetic Patients in Each Group**

|                      | Normal Weight<br>(BMI 20–24 kg/m <sup>2</sup> ), n | Overweight<br>(BMI 25–29 kg/m <sup>2</sup> ), n | Mild Obesity<br>(BMI 30–34 kg/m <sup>2</sup> ), n | Moderate Obesity<br>(BMI 35–39 kg/m <sup>2</sup> ), n | Morbid Obesity<br>(BMI > 40 kg/m <sup>2</sup> ), n | Total, n |
|----------------------|----------------------------------------------------|-------------------------------------------------|---------------------------------------------------|-------------------------------------------------------|----------------------------------------------------|----------|
| Nondiabetic patients | 1,605                                              | 2,927                                           | 1,404                                             | 399                                                   | 153                                                | 6,488    |
| Diabetic patients    | 579                                                | 1,330                                           | 894                                               | 386                                                   | 185                                                | 3,374    |
| Total                | 2,184                                              | 4,257                                           | 2,298                                             | 785                                                   | 338                                                | 9,862    |

BMI = body mass index.

**Table 3. Preoperative Demographic Variables and Risk Factors in Nondiabetic Patients (n = 6,488) Undergoing Primary CABG Surgery**

| Patient Demographic            | Normal Weight<br>(n = 1,605) | Overweight<br>(n = 2,927) | Mild Obesity<br>(n = 1,404) | Moderate Obesity<br>(n = 399) | Morbid Obesity<br>(n = 153) | P Value<br>(Chi-square Analysis) |
|--------------------------------|------------------------------|---------------------------|-----------------------------|-------------------------------|-----------------------------|----------------------------------|
| Age, yr                        | 66 ± 11                      | 63 ± 11                   | 60 ± 10                     | 60 ± 11                       | 59 ± 11                     | < 0.0001                         |
| Female sex, %                  | 27                           | 17                        | 21                          | 24                            | 27                          | < 0.0001                         |
| Smoker, %                      | 51                           | 52                        | 53                          | 60                            | 56                          | < 0.02                           |
| Renal insufficiency, %         | 13                           | 10                        | 10                          | 11                            | 9                           | < 0.04                           |
| Hypertension, %                | 64                           | 68                        | 76                          | 81                            | 76                          | < 0.0001                         |
| Left main CAD, %               | 25                           | 25                        | 24                          | 21                            | 23                          | 0.40                             |
| Triple-vessel CAD, %           | 54                           | 53                        | 50                          | 49                            | 47                          | < 0.03                           |
| Prior myocardial infarction, % | 44                           | 42                        | 41                          | 41                            | 43                          | 0.40                             |
| Unstable angina, %             | 57                           | 54                        | 56                          | 55                            | 56                          | 0.50                             |
| Ejection fraction < 50%, %     | 37                           | 35                        | 34                          | 30                            | 37                          | 0.17                             |
| Congestive heart failure, %    | 15                           | 11                        | 12                          | 15                            | 14                          | < 0.001                          |
| Transient ischemic attack, %   | 4                            | 3                         | 3                           | 3                             | 1                           | 0.35                             |
| Stroke, %                      | 6                            | 4                         | 4                           | 4                             | 5                           | < 0.03                           |
| Pulmonary disease, %           | 27                           | 22                        | 22                          | 27                            | 18                          | < 0.0001                         |
| Hyperlipidemia, %              | 54                           | 63                        | 63                          | 64                            | 62                          | < 0.0001                         |
| β Blockers, %                  | 42                           | 47                        | 46                          | 52                            | 42                          | 0.36                             |
| Calcium channel blockers, %    | 27                           | 26                        | 28                          | 27                            | 33                          | 0.42                             |
| Aspirin, %                     | 62                           | 64                        | 64                          | 63                            | 58                          | 0.32                             |
| Antiarrhythmics, %             | 5                            | 4                         | 4                           | 3                             | 5                           | 0.40                             |
| Diuretics, %                   | 15                           | 14                        | 17                          | 23                            | 22                          | 0.28                             |
| Statins, %                     | 71                           | 76                        | 73                          | 73                            | 63                          | 0.15                             |
| Cross clamp time, min          | 37 ± 19                      | 37 ± 19                   | 39 ± 20                     | 37 ± 18                       | 37 ± 17                     | 0.12                             |
| Total bypass time, min         | 64 ± 28                      | 64 ± 29                   | 67 ± 33                     | 67 ± 32                       | 66 ± 31                     | 0.08                             |

Data are presented as mean ± SEM or n (%).

CABG = coronary artery bypass graft; CAD = coronary artery disease.

sistent ST-segment or T-wave changes (Minnesota code 4-1, 4-2, 5-1, 5-2, or 9-2), serum troponin elevation greater than 10 ng/ml, or clinical evidence of acute MI on autopsy. A diagnosis of stroke was made if there was clinical evidence; or evidence of a new focal or global defect on computed tomography, magnetic resonance imaging, or autopsy. Renal dysfunction was defined as a serum creatinine level of at least 2.0 mg/dl, accompanied by an increase of at least 0.7 mg/dl from baseline; renal failure requiring dialysis; or evidence of renal failure on autopsy. Intraoperative blood glucose levels were measured and treated according to individual physicians' discretion. Postoperatively, a standardized sliding scale insulin regimen was used to maintain the blood glucose levels between 80 and 140 mg/dl.

### Statistical Analysis

All statistical analyses were performed using SAS statistical software (SAS Institute, Cary, NC). Patient preoperative demographics, risk factors, and preoperative medications were first compared between groups by univariate (chi-square) analysis. All predictor variables significant at a two-tailed nominal *P* value of less than 0.15 in the univariate analysis were then entered into a multivariate logistical model, and stepwise logistic regression was performed to determine whether obesity was independently associated with an increased risk of adverse postoperative outcomes in diabetic and nondiabetic patients after primary CABG surgery. Only those

variables significant at a two-tailed nominal *P* value of less than 0.05 were retained within the model. Odds ratios (ORs) and corresponding 95% confidence intervals (CIs) are reported, with associated *P* values. A c-statistic was calculated for each outcome to quantify the discriminatory power of the multivariate regression model.

### Results

Preoperative demographics and risk factors in nondiabetic and diabetic patients are presented in tables 3 and 4, respectively. Of note, the five BMI groups did not significantly differ with respect to age, history of previous MI, unstable angina, ejection fraction less than 50%, stroke, or preoperative medications. Furthermore, no significant differences in intraoperative risk factors (e.g., aortic cross clamp time, cardiopulmonary bypass time) were observed among groups. As expected, the incidence of hyperlipidemia was significantly increased in morbidly obese, diabetic, and nondiabetic patients compared with normal-weight patients (*P* < 0.001). Obese diabetic and nondiabetic patients were significantly younger than normal-weight patients at the time of surgery (*P* < 0.0001). Further, in diabetic patients (table 4), the incidence of hypertension seemed to increase directly with increasing BMI (*P* < 0.0001).

The incidence of adverse postoperative outcomes in nondiabetic patients is presented in table 5. In nondiabetic patients undergoing CABG surgery, obesity was

**Table 4. Preoperative Demographic Variables and Risk Factors in Diabetic Patients (n = 3,374) Undergoing Primary CABG Surgery**

| Patient Demographic            | Normal Weight<br>(n = 579) | Overweight<br>(n = 1,330) | Mild Obesity<br>(n = 894) | Moderate Obesity<br>(n = 386) | Morbid Obesity<br>(n = 185) | P Value<br>(Chi-square Analysis) |
|--------------------------------|----------------------------|---------------------------|---------------------------|-------------------------------|-----------------------------|----------------------------------|
| Age, yr                        | 66 ± 10                    | 64 ± 10                   | 62 ± 9                    | 61 ± 10                       | 57 ± 10                     | < 0.0001                         |
| Female sex, %                  | 32                         | 27                        | 30                        | 42                            | 48                          | < 0.0001                         |
| Smoker, %                      | 45                         | 49                        | 49                        | 47                            | 43                          | 0.33                             |
| Renal insufficiency, %         | 20                         | 15                        | 15                        | 15                            | 11                          | < 0.03                           |
| Hypertension, %                | 72                         | 82                        | 84                        | 90                            | 95                          | < 0.0001                         |
| Left main CAD, %               | 23                         | 21                        | 19                        | 19                            | 18                          | 0.19                             |
| Triple-vessel CAD, %           | 64                         | 64                        | 62                        | 58                            | 56                          | 0.13                             |
| Prior myocardial infarction, % | 47                         | 47                        | 46                        | 46                            | 40                          | 0.54                             |
| Unstable angina, %             | 52                         | 52                        | 53                        | 55                            | 53                          | 0.86                             |
| Ejection fraction < 50%, %     | 48                         | 46                        | 43                        | 40                            | 42                          | 0.14                             |
| Congestive heart failure, %    | 25                         | 23                        | 24                        | 27                            | 31                          | 0.09                             |
| Transient ischemic attack, %   | 5                          | 4                         | 3                         | 3                             | 3                           | 0.56                             |
| Stroke, %                      | 10                         | 8                         | 8                         | 10                            | 4                           | 0.19                             |
| Pulmonary disease, %           | 27                         | 22                        | 25                        | 30                            | 28                          | < 0.02                           |
| Hyperlipidemia, %              | 54                         | 61                        | 65                        | 62                            | 67                          | < 0.001                          |
| β Blocker, %                   | 40                         | 45                        | 45                        | 46                            | 50                          | 0.15                             |
| Calcium channel blocker, %     | 31                         | 29                        | 29                        | 32                            | 34                          | 0.21                             |
| Aspirin, %                     | 60                         | 61                        | 62                        | 62                            | 58                          | 0.33                             |
| Antiarrhythmics, %             | 6                          | 6                         | 3                         | 4                             | 5                           | 0.38                             |
| Diuretics, %                   | 22                         | 21                        | 27                        | 33                            | 42                          | 0.15                             |
| Statins, %                     | 61                         | 72                        | 74                        | 70                            | 68                          | 0.16                             |
| Cross clamp time, min          | 39 ± 20                    | 40 ± 20                   | 41 ± 21                   | 41 ± 24                       | 39 ± 19                     | 0.41                             |
| Total bypass time, min         | 67 ± 31                    | 68 ± 33                   | 72 ± 34                   | 71 ± 36                       | 70 ± 30                     | 0.06                             |

Data are presented as mean ± SEM or n (%).

CABG = coronary artery bypass graft; CAD = coronary artery disease.

not found to be independently associated with any measured adverse postoperative outcome, including mortality, MI, arrhythmias, stroke, or infection. Consistent with previous reports, the incidence of mediastinal reexploration in morbidly obese patients was significantly decreased compared with normal-weight patients (7.0 vs. 1.3%;  $P < 0.05$ ).<sup>30,31</sup>

The incidence of adverse postoperative outcomes in diabetic patients is presented in table 6. In contrast to

nondiabetic patients, the incidences of respiratory failure (20.0 vs. 12.1%), atrial fibrillation (22.2 vs. 18.6%), atrial flutter (10.8 vs. 4.8%), ventricular tachycardia (9.2 vs. 4.7%), renal insufficiency (12.4 vs. 7.4%), leg wound infection (8.1 vs. 1.6%), and duration of hospital stay ( $14.3 \pm 12.7$  vs.  $11.5 \pm 8.7$  days) were significantly greater in morbidly obese patients compared with normal-weight patients, respectively (all outcomes  $P < 0.05$ ). Furthermore, multivariate analysis controlling for

**Table 5. Incidence of Adverse Postoperative Outcomes in Nondiabetic Patients (n = 6,488) after Primary CABG Surgery**

| Postoperative Outcome        | Normal Weight<br>(n = 1,605) | Overweight<br>(n = 2,927) | Mild Obesity<br>(n = 1,404) | Moderate Obesity<br>(n = 399) | Morbid Obesity<br>(n = 153) |
|------------------------------|------------------------------|---------------------------|-----------------------------|-------------------------------|-----------------------------|
| 30-Day mortality, %          | 4.3                          | 2.4                       | 2.8                         | 1.9                           | 2.1                         |
| Respiratory failure, %       | 9.2                          | 8.2                       | 9.9                         | 11.5                          | 9.9                         |
| Atrial fibrillation, %       | 21.2                         | 19.0                      | 17.0                        | 18.3                          | 18.3                        |
| Atrial flutter, %            | 6.2                          | 6.4                       | 5.3                         | 7.8                           | 5.9                         |
| Ventricular fibrillation, %  | 4.7                          | 2.7                       | 2.6                         | 1.5                           | 4.6                         |
| Ventricular tachycardia, %   | 6.1                          | 5.1                       | 5.7                         | 6.0                           | 4.6                         |
| Renal insufficiency, %       | 5.1                          | 4.6                       | 4.6                         | 7.0                           | 7.9                         |
| Stroke, %                    | 2.6                          | 2.2                       | 1.4                         | 1.5                           | 0.7                         |
| Myocardial infarction, %     | 3.9                          | 2.5                       | 3.5                         | 4.0                           | 3.3                         |
| Mediastinal reexploration, % | 7.0                          | 3.9*                      | 3.1*                        | 3.8*                          | 1.3*                        |
| Postoperative IABP, %        | 5.1                          | 3.4                       | 3.6                         | 3.0                           | 4.3                         |
| Sepsis, %                    | 1.5                          | 1.3                       | 1.3                         | 1.8                           | 2.0                         |
| Sternal wound infection, %   | 0.3                          | 0.1                       | 0.5                         | 0.8                           | 0.7                         |
| Leg wound infection, %       | 1.4                          | 1.8                       | 2.4                         | 3.3                           | 2.6                         |
| Hospital stay, days          | 10.6 ± 8.2                   | 9.4 ± 6.4                 | 9.3 ± 5.5                   | 10.1 ± 7.2                    | 10.4 ± 5.2                  |

Data are presented as mean ± SEM or n (%).

\*  $P < 0.05$  compared with the normal-weight group.

CABG = coronary artery bypass graft; IABP = intraaortic balloon pump.



**Table 6. Incidence of Adverse Postoperative Outcomes in Diabetic Patients (n = 3,374) after Primary CABG Surgery**

| Postoperative Outcome        | Normal Weight (n = 579) | Overweight (n = 1,330) | Mild Obesity (n = 894) | Moderate Obesity (n = 386) | Morbid Obesity (n = 185) |
|------------------------------|-------------------------|------------------------|------------------------|----------------------------|--------------------------|
| 30-Day mortality, %          | 5.9                     | 4.1                    | 3.9                    | 5.2                        | 5.4                      |
| Respiratory failure, %       | 12.1                    | 11.7                   | 13.7*                  | 15.5*                      | 20.0*                    |
| Atrial fibrillation, %       | 18.6                    | 21.5                   | 18.6                   | 19.7                       | 22.2*                    |
| Atrial flutter, %            | 4.8                     | 6.8                    | 5.4                    | 7.0                        | 10.8*                    |
| Ventricular fibrillation, %  | 5.2                     | 3.8                    | 4.6                    | 4.4                        | 1.6                      |
| Ventricular tachycardia, %   | 4.7                     | 6.0                    | 7.0*                   | 7.5*                       | 9.2*                     |
| Renal insufficiency, %       | 7.4                     | 7.7                    | 9.1*                   | 10.6*                      | 12.4*                    |
| Stroke, %                    | 4.8                     | 4.7                    | 2.6                    | 4.9                        | 2.2                      |
| Myocardial infarction, %     | 2.1                     | 3.4                    | 2.7                    | 2.6                        | 4.3                      |
| Mediastinal reexploration, % | 4.8                     | 4.9                    | 3.0                    | 4.4                        | 4.3                      |
| Postoperative IABP, %        | 5.0                     | 5.2                    | 5.8                    | 5.7                        | 6.5                      |
| Sepsis, %                    | 2.6                     | 2.4                    | 2.5                    | 2.3                        | 4.3                      |
| Sternal wound infection, %   | 0.0                     | 0.9                    | 1.5                    | 0.8                        | 1.1                      |
| Leg wound infection, %       | 1.6                     | 2.0                    | 3.6*                   | 6.0*                       | 8.1*                     |
| Hospital stay, days          | 11.5 ± 8.7              | 11.9 ± 14.7            | 12.0 ± 9.7             | 12.9 ± 11.6                | 14.3 ± 12.7*             |

Data are presented as mean ± SEM or n (%).

\* P < 0.05 compared with the normal-weight group.

CABG = coronary artery bypass graft; IABP = intraaortic balloon pump.

preoperative demographics, risk factors, medications, and intraoperative risk factors revealed that obesity was independently associated with an increased risk of respiratory failure (OR, 2.26; 95% CI, 1.41–3.61; P < 0.001), ventricular tachycardia (OR, 2.27; 95% CI, 1.18–4.35; P < 0.02), atrial fibrillation (OR, 1.56; 95% CI, 1.03–2.38; P < 0.04), atrial flutter (OR, 2.38; 95% CI, 1.29–4.40; P < 0.01), renal insufficiency (OR, 1.66; 95% CI, 1.10–3.41; P < 0.03), and leg wound infection (OR, 5.34; 95% CI, 2.27–12.54; P < 0.001). Risk-adjusted ORs for adverse postoperative outcomes independently associated with morbid obesity in diabetic patients are presented in figure 1. The c-statistic for these outcomes ranged from 0.64 to 0.74. No significant differences were observed with respect to the incidence of 30-day all-cause mortality, ventricular fibrillation, MI, stroke, sepsis, sternal wound infection, or the need for mediastinal reexploration between groups in the diabetic patients (table 6).

**Discussion**

Although obesity is well known to be a major risk factor for cardiovascular disease, many studies have failed to demonstrate that obesity is independently associated with an increased risk of cardiovascular morbidity and mortality in nondiabetic patients undergoing CABG surgery.<sup>12,30,31</sup> Consistent with previous reports, we now demonstrate that obesity in nondiabetic patients undergoing CABG surgery is not independently associated with an increased risk of death, MI, arrhythmias, or stroke.<sup>12,31</sup> However, in contrast to nondiabetic patients, morbid obesity was independently associated with an increased risk of adverse postoperative outcomes in diabetic patients, even after controlling for preoperative demographics, risk factors, medications, and intraoperative risk factors. Adverse outcomes independently associated with morbid obesity in diabetic patients included respiratory failure, atrial fibrillation, atrial flutter, ventric-

**Fig. 1. Multivariate analysis of adverse postoperative outcomes independently associated with morbid obesity in diabetic patients undergoing primary coronary artery bypass graft surgery. CI = confidence interval.**

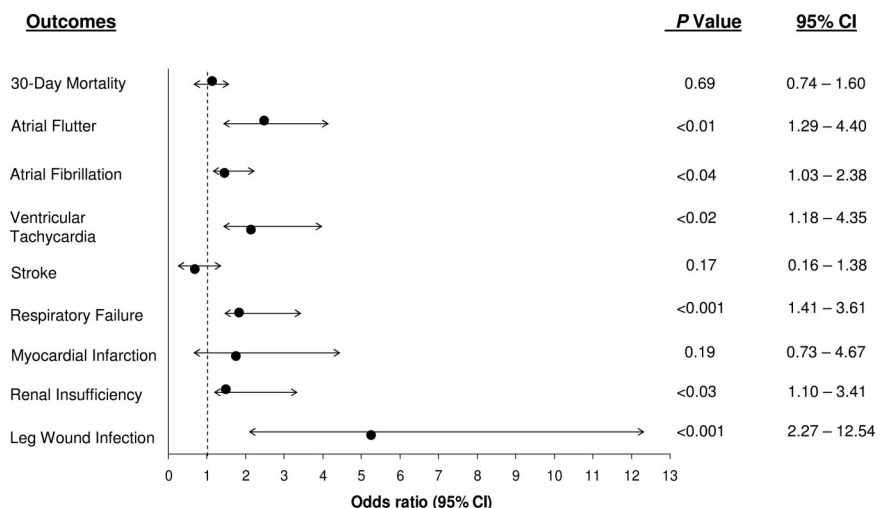

ular tachycardia, renal insufficiency, and leg wound infection. Together, these data thus suggest that obesity in the context of diabetes confers an increased risk of worsened postoperative outcomes in patients undergoing CABG surgery.

Obesity and diabetes are key features of metabolic syndrome, which in turn is associated with increased systemic inflammation, thrombogenicity, and endothelial dysfunction.<sup>3-6,40</sup> Increasing evidence suggests that metabolic syndrome markedly increases the risk of cardiovascular events in ambulatory patient populations.<sup>41</sup> Therefore, patients with metabolic syndrome might also be at greater risk of development of adverse postoperative outcomes compared with normal-weight or obese, nondiabetic patients. Supporting this hypothesis is our observation that the incidence of adverse postoperative outcomes was significantly higher in obese, diabetic patients compared with normal-weight or obese, nondiabetic patients. Further, obesity in diabetic but not in nondiabetic patients was independently associated with worsened postoperative outcomes. Therefore, the interaction between diabetes and obesity may significantly increase perioperative risk.

Previous studies examining the impact of obesity on adverse postoperative outcomes after cardiac surgery have yielded conflicting results. Although several studies have suggested that obesity is associated with an increased risk of postoperative mortality,<sup>32-34,36</sup> MI,<sup>12</sup> respiratory failure,<sup>35</sup> and atrial arrhythmias,<sup>12,13,15,21</sup> other investigations have failed to confirm these findings.<sup>25-31</sup> However, none of these previous studies specifically investigated the impact of obesity in diabetic *versus* nondiabetic patients. In our case series, obesity was not independently associated with an increased risk of any adverse postoperative outcome in nondiabetic patients. In contrast, obesity was independently associated with an increased risk of respiratory failure, atrial fibrillation, atrial flutter, ventricular tachycardia, renal insufficiency, and leg wound infection in diabetic patients. Importantly, obesity was not independently associated with an increased risk of 30-day mortality, stroke, MI, sepsis, or sternal wound infection in diabetic patients. Also consistent with previous reports is our observation that the incidence of mediastinal reexploration was significantly lower in morbidly obese compared with normal-weight, nondiabetic patients.<sup>30,31</sup> However, these data cannot be interpreted to mean that obesity confers a reduced bleeding risk after CABG surgery, because chest tube output was not measured in our study, and no significant difference in the mediastinal reexploration rate was observed in morbidly obese compared with normal-weight, diabetic patients. Nonetheless, Birkmeyer *et al.*<sup>30</sup> previously reported in a series of 11,101 patients that obesity was independently associated with a decreased risk of postoperative bleeding after CABG surgery.

Multiple previous studies have linked obesity to an

increased risk of wound infection.<sup>12-14,15,16,17,20-24,30,31</sup> For example, Prasad *et al.*<sup>12</sup> reported a deep sternal wound infection incidence of 9.2% in obese patients *versus* 2.8% in nonobese patients. Although obesity was not independently associated with an increased risk of sternal wound infection in our case series, obesity was independently predictive of an increased risk of leg wound infection in diabetic patients. One possible explanation as to why obesity in the nondiabetic patients was not predictive of an increased risk of postoperative wound infection is that the observed incidence of sternal and leg wound infection in our case series was lower than that in previous reports.

Although this retrospective cohort study extends the results of previous studies by suggesting that obesity in the setting of diabetes is an independent risk factor for postoperative morbidity after CABG surgery, the current study is not without limitations. First, patient enrollment in our study was neither prospective nor randomized. Despite careful use of logistic regression models to adjust for potential confounders that may affect postoperative outcomes, immeasurable factors may still exist. Second, the relatively low number of morbidly obese patients in our case series may have limited our ability to detect independent, significant associations between obesity and low-frequency, adverse outcomes such as postoperative mortality. Of the three previous clinical studies reporting obesity as an independent risk factor for postoperative mortality after CABG surgery, two had subject enrollments exceeding 300,000 patients.<sup>33,36</sup> It was also because of these same power limitations that we were unable to determine whether obesity is an independent predictor of adverse postoperative outcomes in insulin-dependent *versus* non-insulin-dependent patients. Further research using appropriately designed prospective trials is therefore necessary to evaluate the impact of obesity on surgical outcomes in these subpopulations. Data obtained from such studies may improve perioperative risk stratification and resource utilization.

In conclusion, obesity seems to confer a greater risk of postoperative morbidity after primary CABG surgery in diabetic compared with nondiabetic patients.

The authors thank Layne O. Gentry, M.D. (Chief of the Department for Infection Control at Saint Luke's Episcopal Hospital, Houston, Texas), for assistance in collecting infection data.

## References

1. Wilson PW, Grundy SM: The metabolic syndrome: Practical guide to origins and treatment. *Circulation* 2003; 108:1422-4
2. Liu F, Zhang HY, Liu XN, Yang HY, Kang ZH, Shi XZ, Yang Y, Hui RT: The association between metabolic syndrome and atherosclerosis [in Chinese]. *Zhonghua Yi Xue Za Zhi* 2003; 83:1317-20
3. Hanley AJ, Festa A, D'Agostino RB, Wagenknecht LE, Savage PJ, Tracy RP, Saad MF, Haffner SM: Metabolic and inflammation variable clusters and prediction of type 2 diabetes: Factor analysis using directly measured insulin sensitivity. *Diabetes* 2004; 53:1773-81

4. Garg R, Tripathy D, Dandona P: Insulin resistance as a proinflammatory state: Mechanisms, mediators, and therapeutic interventions. *Curr Drug Targets* 2003; 4:487-92
5. Festa A, Hanley AJ, Tracy RP, D'Agostino Jr, R Haffner SM: Inflammation in the prediabetic state is related to increased insulin resistance rather than decreased insulin secretion. *Circulation* 2003; 108:1822-30
6. Festa A, D'Agostino Jr, R Howard G, Mykkanen L, Tracy RP, Haffner SM: Chronic subclinical inflammation as part of the insulin resistance syndrome: The Insulin Resistance Atherosclerosis Study (IRAS). *Circulation* 2000; 102:42-7
7. Festa A, D'Agostino Jr, R Tracy RP, Haffner SM: Elevated levels of acute-phase proteins and plasminogen activator inhibitor-1 predict the development of type 2 diabetes: The Insulin Resistance Atherosclerosis Study. *Diabetes* 2002; 51:1131-7
8. Festa A, Haffner SM: Inflammation and cardiovascular disease in patients with diabetes: Lessons from the Diabetes Control and Complications Trial. *Circulation* 2005; 111:2414-5
9. Lebovitz HE: The relationship of obesity to the metabolic syndrome. *Int J Clin Pract Suppl* 2003; 134:18-27
10. Ginsberg HN, Zhang YL, Hernandez-Ono A: Regulation of plasma triglycerides in insulin resistance and diabetes. *Arch Med Res* 2005; 36:232-40
11. Fruchart JC: Insulin-resistance and lipoprotein abnormalities. *Diabete Metab* 1991; 17:244-8
12. Prasad US, Walker WS, Sang CT, Campanella C, Cameron EW: Influence of obesity on the early and long term results of surgery for coronary artery disease. *Eur J Cardiothorac Surg* 1991; 5:67-72
13. Moulton MJ, Creswell LL, Mackey ME, Cox JL, Rosenbloom M: Obesity is not a risk factor for significant adverse outcomes after cardiac surgery. *Circulation* 1996; 94:1187-92
14. Noyez L, van Druten JA, Mulder J, Schroen AM, Skotnicki SH, Brouwer RM: Sternal wound complications after primary isolated myocardial revascularization: The importance of the post-operative variables. *Eur J Cardiothorac Surg* 2001; 19:471-6
15. Gardlund B, Bitkover CY, Vaage J: Postoperative mediastinitis in cardiac surgery: Microbiology and pathogenesis. *Eur J Cardiothorac Surg* 2002; 21:825-30
16. Ridderstolpe L, Gill H, Granfeldt H, Ahlfeldt H, Rutberg H: Superficial and deep sternal wound complications: incidence, risk factors and mortality. *Eur J Cardiothorac Surg* 2001; 20:1168-75
17. Schwann TA, Habib RH, Zacharias A, Parenteau GL, Riordan CJ, Durham SJ, Engoren M: Effects of body size on operative, intermediate, and long-term outcomes after coronary artery bypass operation. *Ann Thorac Surg* 2001; 71:521-30
18. Clough RA, Leavitt BJ, Morton JR, Plume SK, Hernandez F, Nugent W, Lahey SJ, Ross CS, O'Connor GT: The effect of comorbid illness on mortality outcomes in cardiac surgery. *Arch Surg* 2002; 137:428-32
19. Gurm HS, Whitlow PL, Kip KE: The impact of body mass index on short- and long-term outcomes inpatients undergoing coronary revascularization: Insights from the Bypass Angioplasty Revascularization Investigation (BARD). *J Am Coll Cardiol* 2002; 39:834-40
20. Olsen MA, Lock-Buckley P, Hopkins D, Polish LB, Sundt TM, Fraser VJ: The risk factors for deep and superficial chest surgical-site infections after coronary artery bypass graft surgery are different. *J Thorac Cardiovasc Surg* 2002; 124:136-45
21. Kuduvali M, Grayson AD, Oo AY, Fabri BM, Rashid A: Risk of morbidity and in-hospital mortality in obese patients undergoing coronary artery bypass surgery. *Eur J Cardiothorac Surg* 2002; 22:787-93
22. Potapov EV, Loebe M, Anker S, Stein J, Bondy S, Nasser BA, Sodian R, Hausmann H, Hetzer R: Impact of body mass index on outcome in patients after coronary artery bypass grafting with and without valve surgery. *Eur Heart J* 2003; 24:1933-41
23. Russo PL, Spelman DW: A new surgical-site infection risk index using risk factors identified by multivariate analysis for patients undergoing coronary artery bypass graft surgery. *Infect Control Hosp Epidemiol* 2002; 23:372-6
24. Lindhout AH, Wouters CW, Noyez L: Influence of obesity on in-hospital and early mortality and morbidity after myocardial revascularization. *Eur J Cardiothorac Surg* 2004; 26:535-41
25. Christakis GT, Weisel RD, Buth KJ, Fremes SE, Rao V, Panagiotopoulos KP, Ivanov J, Goldman BS, David TE: Is body size the cause for poor outcomes of coronary artery bypass operations in women? *J Thorac Cardiovasc Surg* 1995; 110:1344-56
26. Brandt M, Harder K, Walluscheck KP, Schottler J, Rahimi A, Moller F, Cremer J: Severe obesity does not adversely affect perioperative mortality and morbidity in coronary artery bypass surgery. *Eur J Cardiothorac Surg* 2001; 19:662-6
27. Reeves BC, Ascione R, Chamberlain MH, Angelini GD: Effect of body mass index on early outcomes in patients undergoing coronary artery bypass surgery. *J Am Coll Cardiol* 2003; 42:668-76
28. Rcock MA, Fox SA, Stitt LW, Lehnhardt KR, McKenzie FN, Quantz MA, Menkis AH, Novick RJ: Is obesity a predictor of mortality, morbidity and readmission after cardiac surgery? *Can J Surg* 2004; 47:34-8
29. Jin R, Grunkemeier GL, Furnary AP, Handy JR Jr: Is obesity a risk factor for mortality in coronary artery bypass surgery? *Circulation* 2005; 111:3359-65
30. Birkmeyer NJ, Charlesworth DC, Hernandez F, Leavitt BJ, Marrin CA, Morton JR, Olmstead EM, O'Connor GT: Obesity and risk of adverse outcomes associated with coronary artery bypass surgery. Northern New England Cardiovascular Disease Study Group. *Circulation* 1998; 97:1689-94
31. Kim J, Hammar N, Jakobsson K, Luepker RV, McGovern PG, Ivett T: Obesity and the risk of early and late mortality after coronary artery bypass graft surgery. *Am Heart J* 2003; 146:555-60
32. Shuhaiber H, Chugh T, Portojan-Shuhaiber S, Ghosh D: Wound infection in cardiac surgery. *J Cardiovasc Surg (Torino)* 1987; 28:139-42
33. Edwards FH, Carey JS, Grover FL, Bero JW, Hartz RS: Impact of gender on coronary bypass operative mortality. *Ann Thorac Surg* 1998; 66:125-31
34. Hollenbeak CS, Murphy DM, Koenig S, Woodward RS, Dunagan WC, Fraser VJ: The clinical and economic impact of deep chest surgical site infections following coronary artery bypass graft surgery. *Chest* 2000; 118:397-402
35. Weiss YG, Merin G, Koganov E, Ribo A, Oppenheim-Eden A, Medalion B, Peruanski M, Reider E, Bar-Ziv J, Hanson WC, Pizov R: Postcardiopulmonary bypass hypoxemia: A prospective study on incidence, risk factors, and clinical significance. *J Cardiothorac Vasc Anesth* 2000; 14:506-13
36. Prabhakar G, Haan CK, Peterson ED, Coombs LP, Cruzzavala JL, Murray GF: The risks of moderate and extreme obesity for coronary artery bypass grafting outcomes: A study from the Society of Thoracic Surgeons' database. *Ann Thorac Surg* 2002; 74:1125-30
37. Keys A, Fidanza F, Karvonen MJ, Kimura N, Taylor HL: Indices of relative weight and obesity. *J Chronic Dis* 1972; 25:329-43
38. Obesity: Preventing and managing the global epidemic. Report of a WHO consultation. *World Health Organ Tech Rep Ser* 2000; 894:i-xiii, 1-253
39. Pan W, Pintar T, Anton J, Lee VV, Vaughn WK, Collard CD: Statins are associated with a reduced incidence of perioperative mortality after coronary artery bypass graft surgery. *Circulation* 2004; 110:II45-9
40. Mokdad AH, Ford ES, Bowman BA, Dietz WH, Vinicor F, Bales VS, Marks JS: Prevalence of obesity, diabetes, and obesity-related health risk factors, 2001. *JAMA* 2003; 289:76-9
41. Hunt KJ, Resendez RG, Williams K, Haffner SM, Stern MP: National Cholesterol Education Program *versus* World Health Organization metabolic syndrome in relation to all-cause and cardiovascular mortality in the San Antonio Heart Study. *Circulation* 2004; 110:1251-7
